# Supplementary material for: Phylogenomics and Divergence Dating of Fungus-Farming Ants (Hymenoptera: Formicidae) of the Genera Sericomyrmex and Apterostigma
Source: PLoS One. 2016 Jul 28;11(7):e0151059. doi: 10.1371/journal.pone.0151059 (PMC4965065; doi:10.1371/journal.pone.0151059)
Supplement: S2 Table — GO distributions by level, by species, with GO-ID numbers, the output of BLASTtoGO Annotation analyses. (XLSX) [file pone.0151059.s003.xlsx]

## Sheet: Sheet1
S4 Table	GO distributions by level, by species, with GO-ID numbers, the output of BLASTtoGO Annotation analyses.
		Apterostigma megacephala	Sericomyrmex cf. mayri	Sericomyrmex cf. parvulus	Sericomyrmex cf. luederwaldti
GO-id	GO-term	#Seqs	#Seqs	#Seqs	#Seqs
	Biological processes	50366	46495	52420	47920
GO:0009987	cellular process	13940	12345	14420	12865
GO:0008152	metabolic process	12887	12730	13230	11462
GO:0044699	single-organism process	7323	6747	8143	7475
GO:0065007	biological regulation	4520	3995	4243	4376
GO:0051179	localization	3548	3093	3660	3387
GO:0050896	response to stimulus	3261	2908	3601	3327
GO:0023052	signaling	2665	2355	2653	2702
GO:0071840	cellular component organization or biogenesis	1115	1054	976	993
GO:0032501	multicellular organismal process	448	521	749	581
GO:0032502	developmental process	236	350	293	305
GO:0022610	biological adhesion	196	216	221	237
GO:0040011	locomotion	97	53	72	69
GO:0040007	growth	45	31	52	34
GO:0002376	immune system process	31	41	26	28
GO:0000003	reproduction	27	25	31	40
GO:0051704	multi-organism process	24	28	45	37
GO:0001906	cell killing	2	1	2	0
GO:0048511	rhythmic process	1	2	3	2
	Molecular Function	32999	27495	34303	30926
GO:0005488	binding	13788	11820	14406	13271
GO:0003824	catalytic activity	12436	10104	12645	11131
GO:0005215	transporter activity	2158	1830	2412	2060
GO:0060089	molecular transducer activity	1084	934	1223	1041
GO:0030234	enzyme regulator activity	1056	686	796	962
GO:0004872	receptor activity	935	868	1119	899
GO:0001071	nucleic acid binding transcription factor activity	645	545	603	712
GO:0005198	structural molecule activity	343	462	577	362
GO:0009055	electron carrier activity	325	68	332	274
GO:0000988	protein binding transcription factor activity	144	113	96	126
GO:0016209	antioxidant activity	78	58	81	75
GO:0016530	metallochaperone activity	4	0	4	8
GO:0031386	protein tag	3	4	4	3
GO:0016247	channel regulator activity	0	2	4	2
GO:0045182	translation regulator activity		1	1
	Celular Component	20098	18641	21954	18944
GO:0005623	cell	6529	5743	6842	6108
GO:0016020	membrane	5531	5335	6586	5566
GO:0043226	organelle	4115	4049	4594	4055
GO:0032991	macromolecular complex	2400	2316	2500	2137
GO:0031974	membrane-enclosed lumen	421	305	353	272
GO:0005576	extracellular region	369	465	530	438
GO:0045202	synapse	330	101	146	106
GO:0030054	cell junction	281	106	146	116
GO:0031012	extracellular matrix	113	133	223	134
GO:0019012	virion	8	88	34	12
GO:0009295	nucleoid	1
